# Supplementary material for: Enhancement of electrocatalytic CO2 performance by different components of Cu-based bimetallic MOFs
Source: Royal Society of Chemistry journal article supplement (doi:10.1039/d4nj03650f), 2024-01-01
Supplement: d4nj03650f1.pdf [file d4nj03650f1.pdf]

*Supporting information*

**Enhancement of electrocatalytic CO<sub>2</sub> performance by different  
components of Cu-based bimetallic MOFs**

Jvwei Liu<sup>a</sup>, Qiang Zhang<sup>a,b\*</sup>, Jianlin Wang<sup>a</sup>, Conglin Chen<sup>a</sup>, Shenjie Zhang<sup>a</sup>, Fang  
Guo<sup>a</sup>, Junqiang Xu<sup>a</sup>

<sup>a</sup> *School of Chemistry & Chemical Engineering, Chongqing University of Technology,  
Chongqing 400054, P. R. China.*

<sup>b</sup> *National Engineering Laboratory for Methanol to Olefins, Dalian National  
Laboratory for Clean Energy, iChEM (Collaborative Innovation Center of  
Chemistry for Energy Materials), Dalian Institute of Chemical Physics, Chinese  
Academy of Sciences, Dalian 116023, P. R. China.*

*\*Corresponding authors: School of Chemistry & Chemical Engineering, Chongqing  
University of Technology, Chongqing 400054, P. R. China.*

*E-mail addresses: [zqiang@cqut.edu.cn](mailto:zqiang@cqut.edu.cn) (Qiang Zhang)*

**Mailing address for correspondence:**

Qiang Zhang (A\Prof.)

*School of Chemistry & Chemical Engineering, Chongqing University of  
Technology, Chongqing 400054, P. R. China*

E-mail: [zqiang@cqut.edu.cn](mailto:zqiang@cqut.edu.cn)

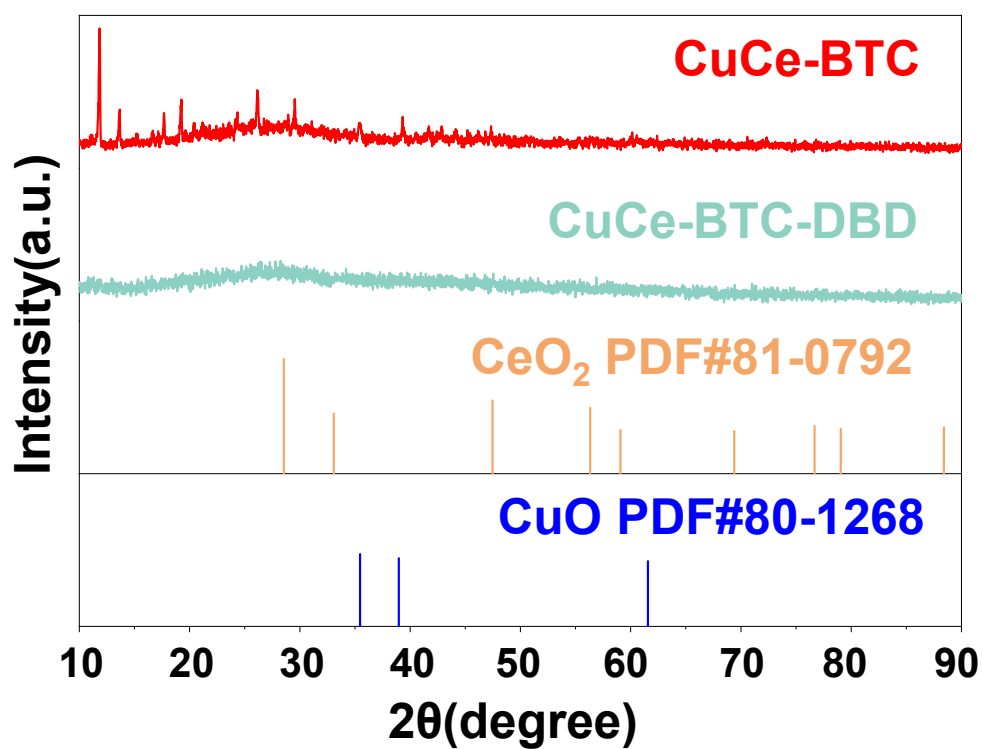

Figure S1. XRD patterns of CuCe-BTC catalysts before and after O<sub>2</sub>-DBD treatment

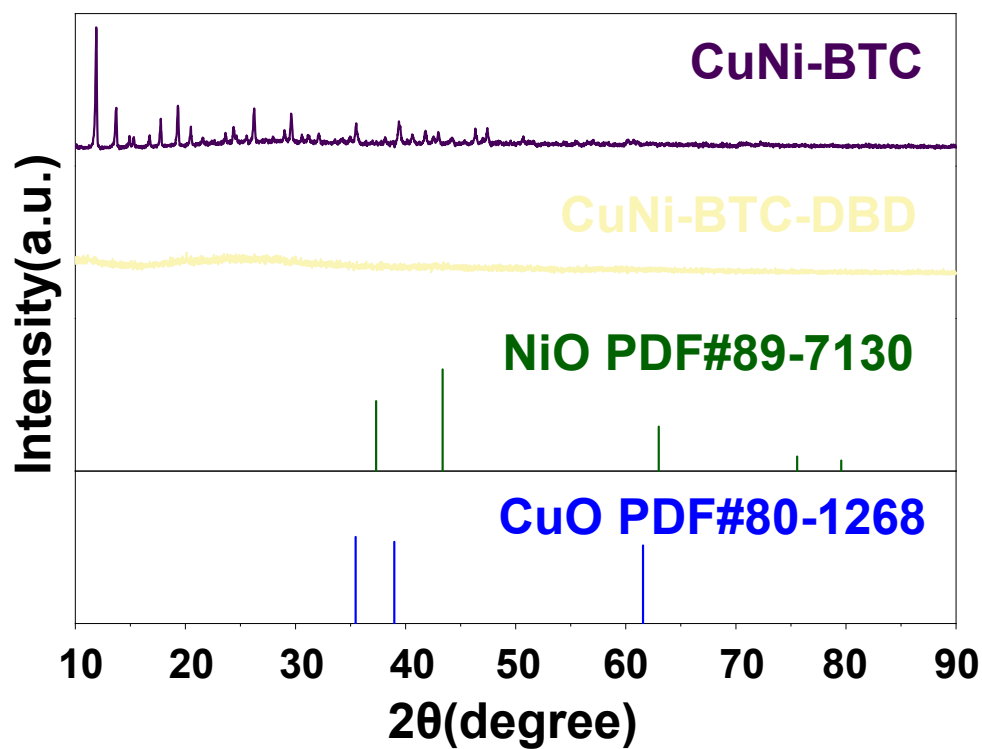

Figure S2. XRD patterns of CuNi-BTC catalysts before and after O<sub>2</sub>-DBD treatment

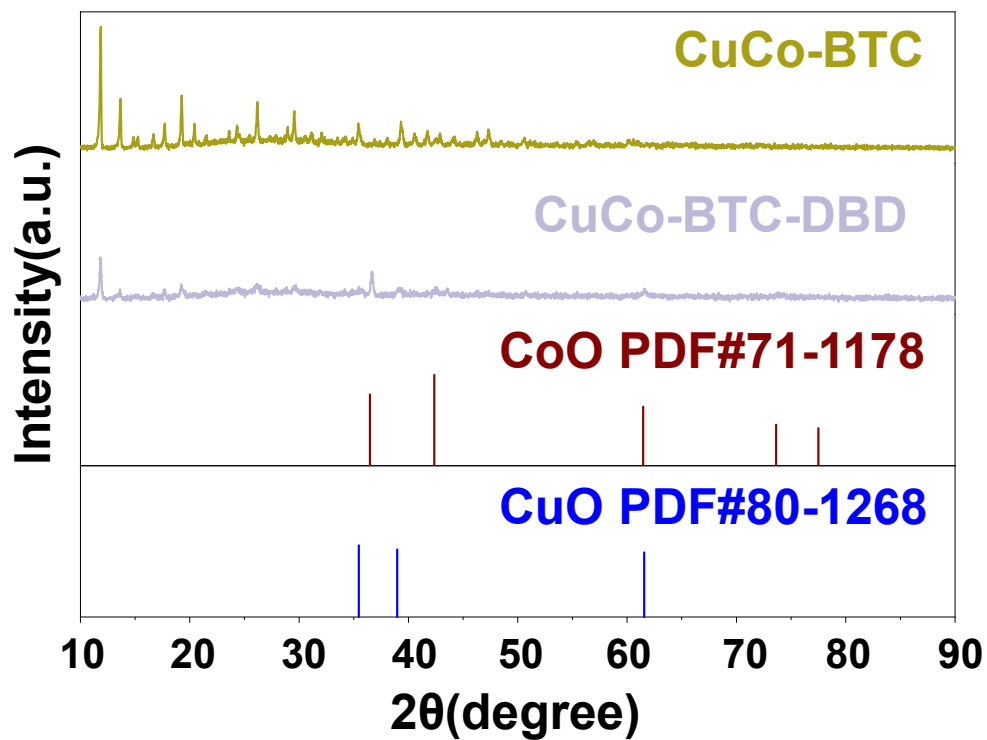

Figure S3. XRD patterns of CuCo-BTC catalysts before and after O<sub>2</sub>-DBD treatment

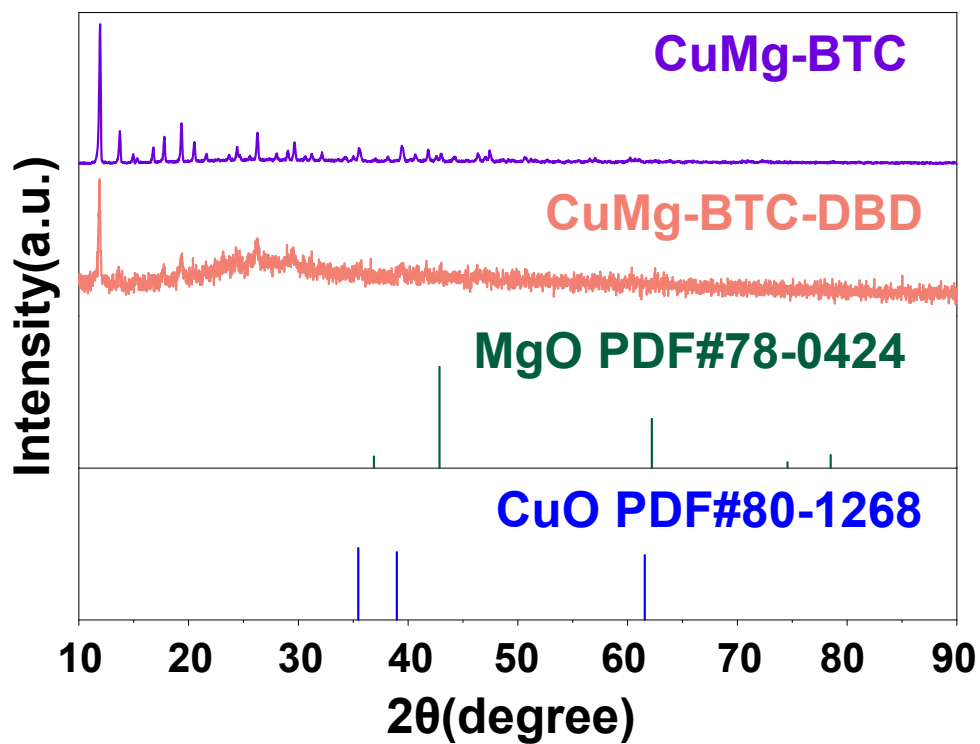

Figure S4. XRD patterns of CuMg-BTC catalysts before and after O<sub>2</sub>-DBD treatment

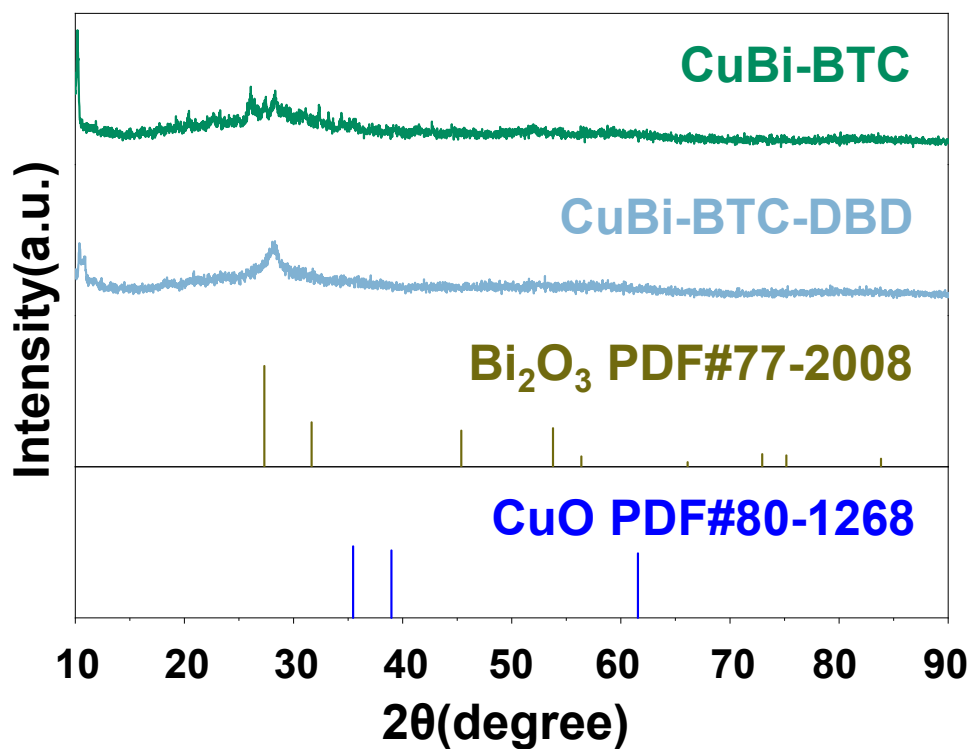

Figure S5. XRD patterns of CuBi-BTC catalysts before and after O<sub>2</sub>-DBD treatment

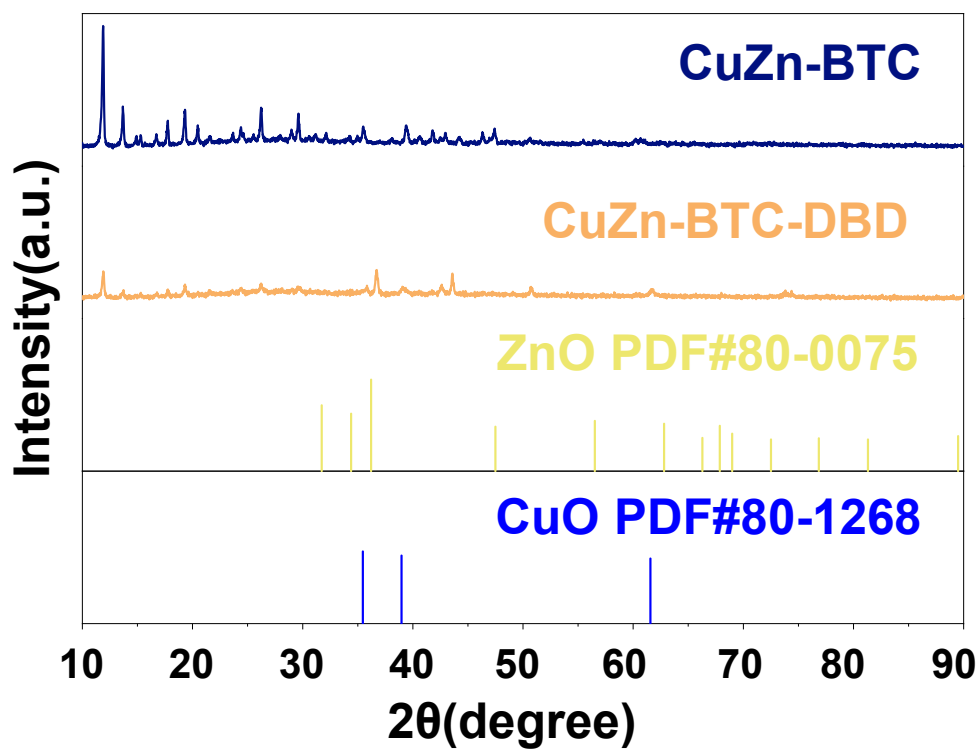

Figure S6. XRD patterns of CuZn-BTC catalysts before and after O<sub>2</sub>-DBD treatment

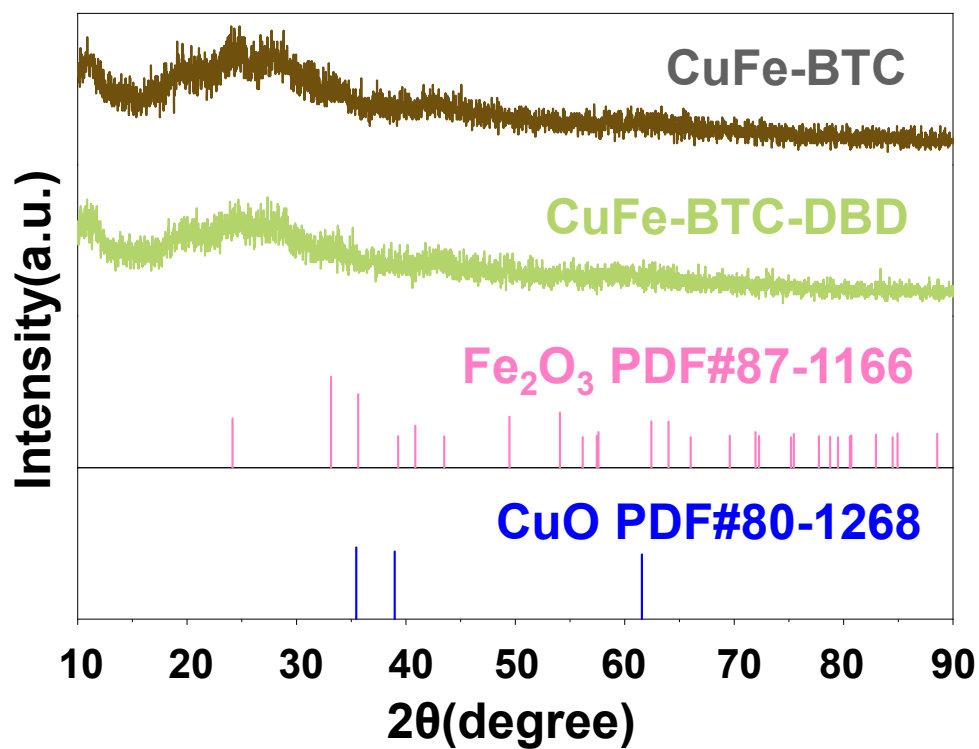

Figure S7. XRD patterns of CuFe-BTC catalysts before and after O<sub>2</sub>-DBD treatment

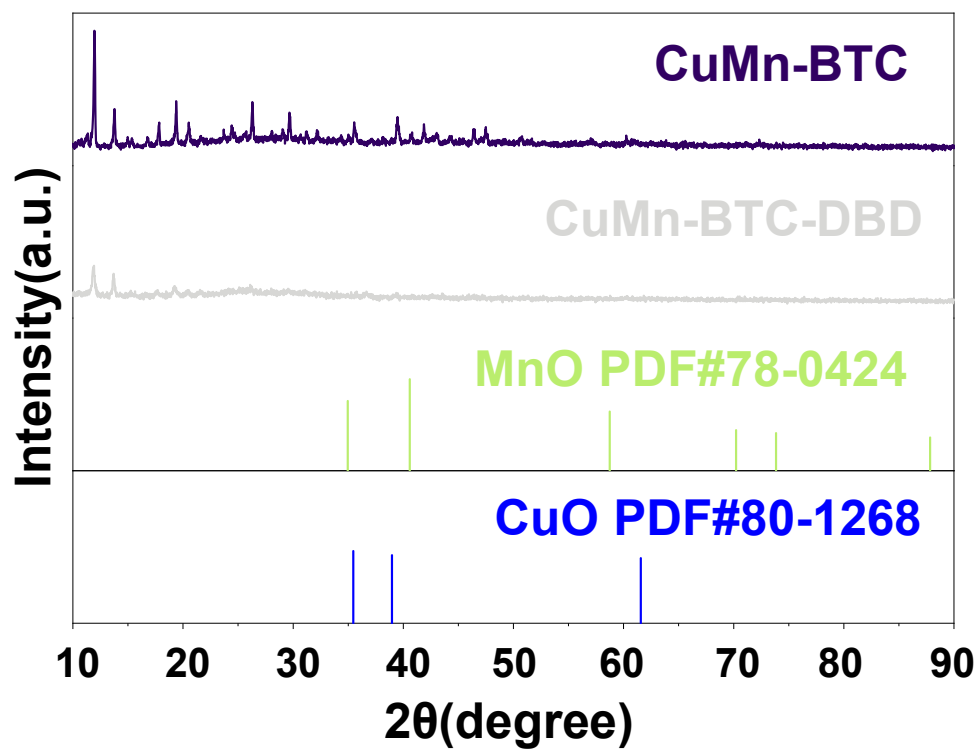

Figure S8. XRD patterns of CuMn-BTC catalysts before and after O<sub>2</sub>-DBD treatment

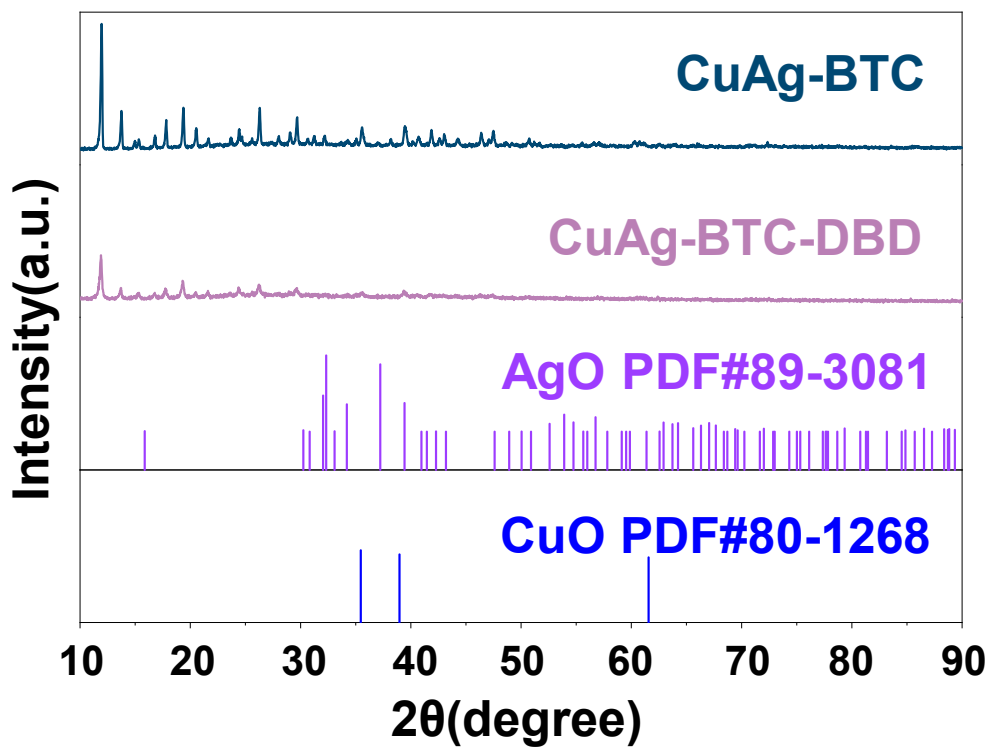

Figure S9. XRD patterns of CuAg-BTC catalysts before and after O<sub>2</sub>-DBD treatment

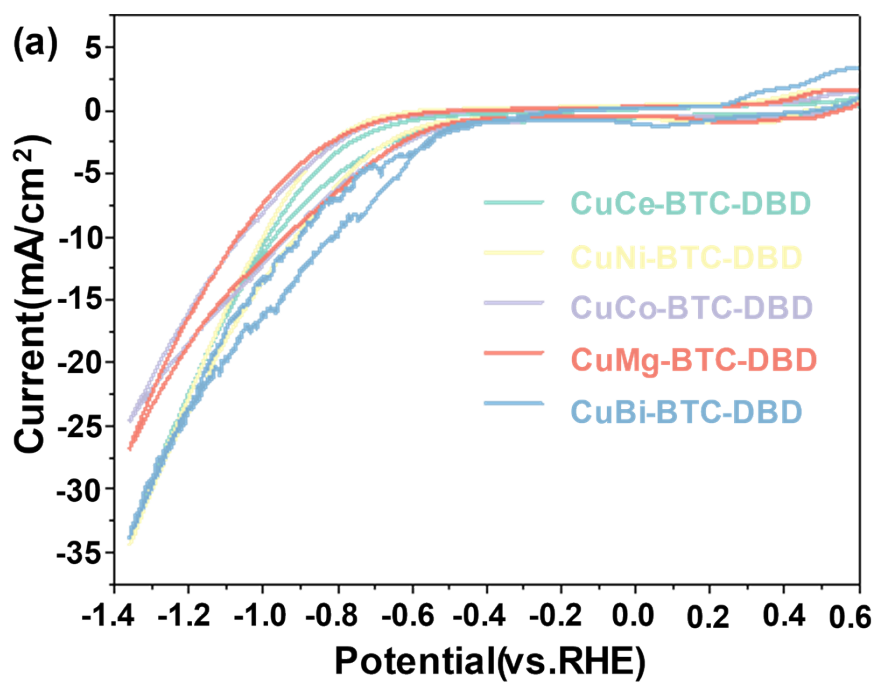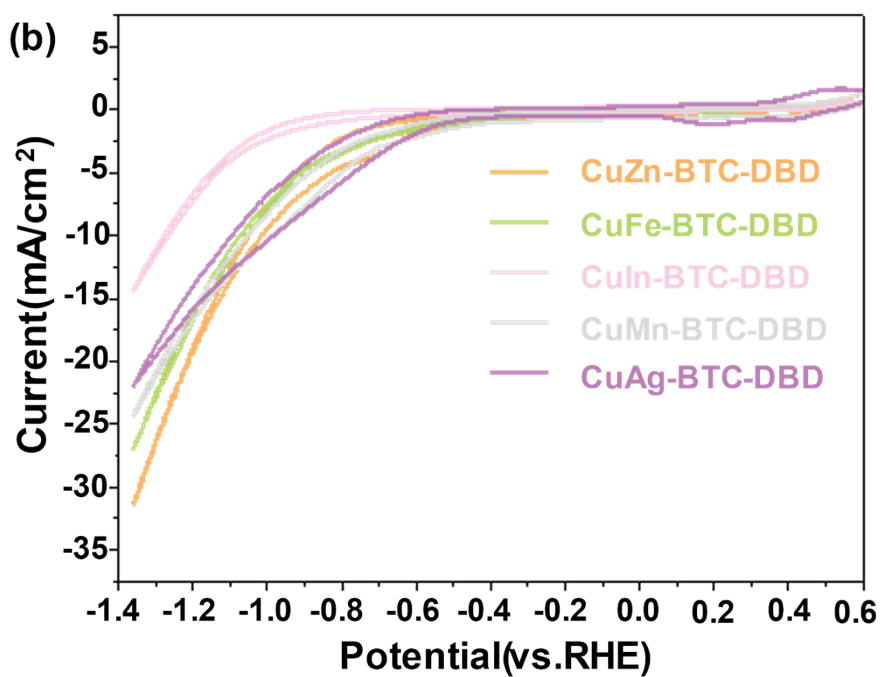

Figure S10. (a)-(b) Cyclic voltammetry curves (CV) of different catalysts after O<sub>2</sub>-DBD treatment.

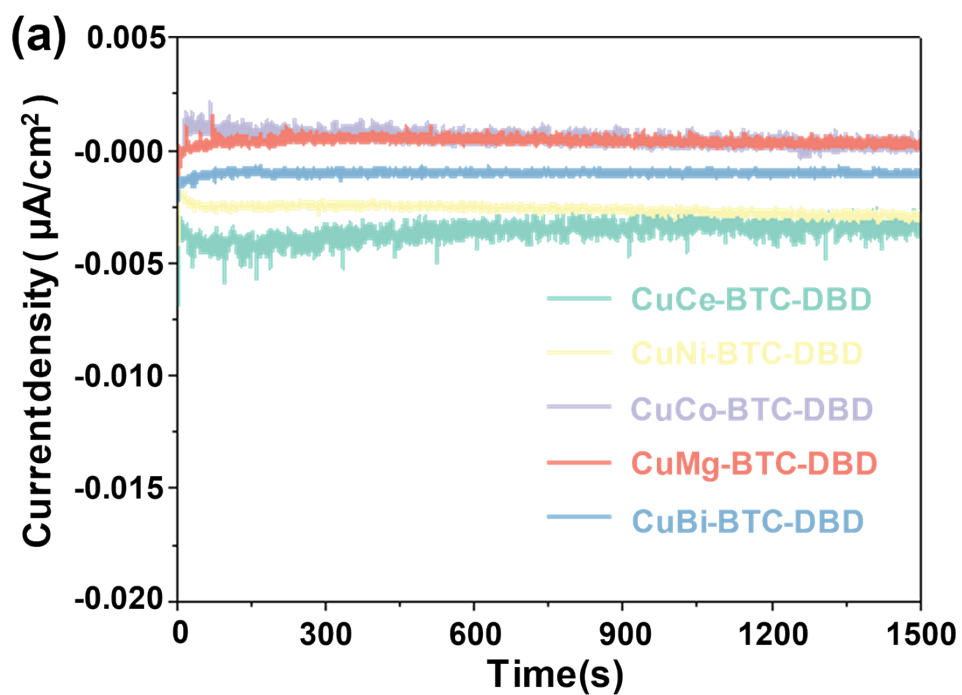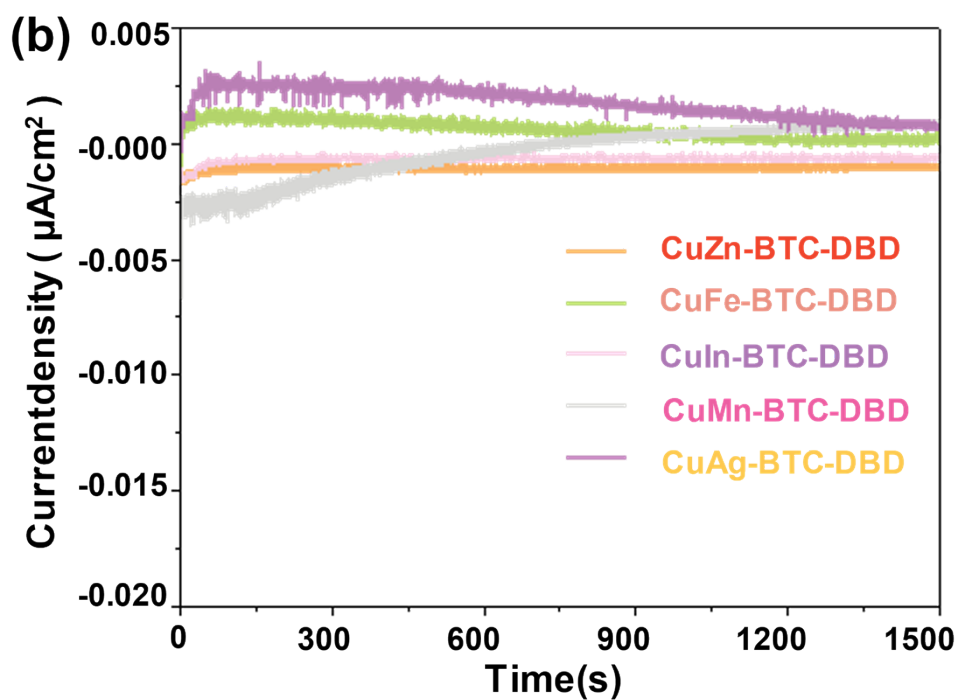

Figure S11. (a)-(b) Stability test (it) of different catalysts after O<sub>2</sub>-DBD treatment.

BD treatment.



**Table S1.** Comparison of the performance of Cu-based and Cu-based MOF-derived catalysts for the electrocatalytic reduction of CO<sub>2</sub> to ethanol.

| Catalysts                                           | Onset potential (V vs.RHE) | $J_{\text{ethanol}}$ (mA/cm <sup>2</sup> ) | FE <sub>ethanol</sub> (%) | Stability (h) | C <sub>dl</sub> (mF/cm <sup>2</sup> ) | Refs.           |
|-----------------------------------------------------|----------------------------|--------------------------------------------|---------------------------|---------------|---------------------------------------|-----------------|
| CuIn-BTC-DBD                                        | -0.2                       | 36                                         | 87                        |               |                                       | This work       |
| Cu/BNC-1                                            | -1                         | 20.4                                       | 58.64                     | 24            | 45                                    | S1              |
| V <sub>Se</sub> -Cu <sub>2-x</sub> Se               | -0.8                       | 10.96                                      | 68.1                      | 6             | 7.88                                  | S2              |
| Cu <sup>+</sup> /hf-Cu                              | -0.8                       | 0.23                                       | 43                        | 6             |                                       | S3 <sup>o</sup> |
| LNCCs                                               | -1                         | 8.66                                       | 82.5                      | 10            | 2.81                                  | S4              |
| dCu <sub>2</sub> O/Ag <sub>2.3%</sub>               | -0.87                      | 326.4                                      | 40.8                      | 12            |                                       | S5              |
| SnS <sub>2</sub> /Sn <sub>1</sub> -O <sub>3</sub> G | -0.7                       | 17.8                                       | 82.5                      | 100           |                                       | S6              |
| CuAg-0.75%                                          | -0.71                      | 214                                        | 20                        | 60            |                                       | S7              |
| PGA-2                                               | -0.8                       | 4.7                                        | 48.7                      | 70            | 28                                    | S8              |
| Ag-Cu 5 %                                           | -0.3                       | 320                                        | 52.6                      | 60            | 6.27                                  | S9              |
| K <sub>11.2%</sub> - Cu <sub>2</sub> Se             | -0.6                       | 35.8                                       | 70.3                      | 130           | 37.1                                  | S10             |
| CuOx@C                                              | -1                         | 164                                        | 45                        | 56            | 10.03                                 | S11             |
| Cu-N-G                                              | -0.4                       | 21                                         | 33.1                      |               |                                       | S12             |
| Cu/CuNC                                             | -0.2                       | 1                                          | 55                        | 6             |                                       | S13             |
| Cu <sub>2</sub> -CuN <sub>3</sub>                   | -0.7                       | 14.4                                       | 51                        | 10            |                                       | S14             |
| Cu <sub>1.22</sub> V <sub>0.19</sub> Se             | -0.4                       | 21.3                                       | 70.5                      | 138           | 41.4                                  | S15             |
| Cu/Bi                                               | -0.21                      | 20                                         | 28.3                      | 5             |                                       | S16             |
| H-Ru10                                              | -1                         | 20                                         | 47.2                      | 1             |                                       | S17             |

- S1. B. Shao, D. Huang, R. K. Huang, X. L. He, Y. Luo, Y. L. Xiang, L. B. Jiang, M. Dong, S. Li, Z. Zhang and J. Huang, Metal-Organic Framework Supported Low-Nuclearity Cluster Catalysts for Highly Selective Carbon Dioxide Electroreduction to Ethanol, *Angew. Chem., Int. Ed.*, 2024, DOI: 10.1002/anie.202409270.
- S2. Y. Zang, T. Liu, P. Wei, H. Li, Q. Wang, G. Wang and X. Bao, Selective CO<sub>2</sub> Electroreduction to Ethanol over a Carbon-Coated CuO<sub>x</sub> Catalyst, *Angew. Chem., Int. Ed.*, 2022, **61**, e202209629.
- S3. Y. Zhao, Q. Yuan, R. Xu, C. Zhang, K. Sun, A. Wang, A. Zhang, Z. Wang, J. Jiang and M. Fan, Boosting electrochemical conversion of CO<sub>2</sub> to ethanol through the confinement of pyridinic N-B layer on copper nanoparticles, *Appl. Catal., B*, 2024, **355**.124168
- S4. H. Wang, X. Bi, Y. Yan, Y. Zhao, Z. Yang, H. Ning and M. Wu, Efficient Electrocatalytic Reduction of CO<sub>2</sub> to Ethanol Enhanced by Spacing Effect of Cu-Cu in Cu<sub>2-x</sub>Se Nanosheets, *Adv. Funct. Mater.*, 2023, **33**.2214946
- S5. J. Y. Kim, G. Kim, H. Won, I. Gereige, W. B. Jung and H. T. Jung, Synergistic Effect of Cu<sub>2</sub>O Mesh Pattern on High-Facet Cu Surface for Selective CO<sub>2</sub> Electroreduction to Ethanol, *Adv. Mater.*, 2022, **34**, e2106028.
- S6. J. Ding, H. Bin Yang, X.-L. Ma, S. Liu, W. Liu, Q. Mao, Y. Huang, J. Li, T. Zhang and B. Liu, A tin-based tandem electrocatalyst for CO<sub>2</sub> reduction to ethanol with 80% selectivity, *Nat. Energy*, 2023, **8**, 1386-1394.

- S7. F. Yang, C. Liang, H. Yu, Z. Zeng, Y. M. Lam, S. Deng and J. Wang, Phosphorus-Doped Graphene Aerogel as Self-Supported Electrocatalyst for CO<sub>2</sub> -to-Ethanol Conversion, *Adv. Sci.*, 2022, **9**, e2202006.
- S8. W. Sun, P. Wang, Y. Jiang, Z. Jiang, R. Long, Z. Chen, P. Song, T. Sheng, Z. Wu and Y. Xiong, V-Doped Cu<sub>2</sub>Se Hierarchical Nanotubes Enabling Flow-Cell CO<sub>2</sub> Electroreduction to Ethanol with High Efficiency and Selectivity, *Adv. Mater.*, 2022, **34**, e2207691.
- S9. P. Wang, H. Yang, C. Tang, Y. Wu, Y. Zheng, T. Cheng, K. Davey, X. Huang and S. Z. Qiao, Boosting electrocatalytic CO<sub>2</sub>-to-ethanol production via asymmetric C-C coupling, *Nat. Commun.*, 2022, **13**, 3754.
- S10. H. Tang, Y. Liu, Y. Zhou, Y. Qian and B.-L. Lin, Boosting the Electroreduction of CO<sub>2</sub> to Ethanol via the Synergistic Effect of Cu-Ag Bimetallic Catalysts, *ACS Appl. Energy Mater.*, 2022, **5**, 14045-14052.
- S11. Z. Cai, N. Cao, F. Zhang, X. Lv, K. Wang, Y. He, Y. Shi, H. Bin Wu and P. Xie, Hierarchical Ag-Cu interfaces promote C-C coupling in tandem CO<sub>2</sub> electroreduction, *Appl. Catal., B*, 2023, **325**.122310
- S12. L. Ding, N. Zhu, Y. Hu, Z. Chen, P. Song, T. Sheng, Z. Wu and Y. Xiong, Over 70 % Faradaic Efficiency for CO<sub>2</sub> Electroreduction to Ethanol Enabled by Potassium Dopant-Tuned Interaction between Copper Sites and Intermediates, *Angew. Chem., Int. Ed.*, 2022, **61**, e202209268.
- S13. D. Zang, X. J. Gao, L. Li, Y. Wei and H. Wang, Confined interface engineering of self-supported Cu@N-doped graphene for electrocatalytic CO<sub>2</sub> reduction

- with enhanced selectivity towards ethanol, *Nano Res.*, 2022, **15**, 8872-8879.
- S14. Y. Yang, J. Fu, Y. Ouyang, T. Tang, Y. Zhang, L. R. Zheng, Q. H. Zhang, X. Z. Liu, J. Wang and J. S. Hu, In-situ constructed Cu/CuNC interfaces for low-overpotential reduction of CO<sub>2</sub> to ethanol, *Natl. Sci. Rev.*, 2023, **10**, nwac248.
- S15. X. Su, Z. Jiang, J. Zhou, H. Liu, D. Zhou, H. Shang, X. Ni, Z. Peng, F. Yang, W. Chen, Z. Qi, D. Wang and Y. Wang, Complementary Operando Spectroscopy identification of in-situ generated metastable charge-asymmetry Cu<sub>2</sub>-CuN<sub>3</sub> clusters for CO<sub>2</sub> reduction to ethanol, *Nat. Commun.*, 2022, **13**, 1322.
- S16. J. Albo, M. Perfecto-Irigaray, G. Beobide and A. Irabien, Cu/Bi metal-organic framework-based systems for an enhanced electrochemical transformation of CO<sub>2</sub> to alcohols, *J. CO<sub>2</sub> Util.*, 2019, **33**, 157-165.
- S17. M. Perfecto-Irigaray, J. Albo, G. Beobide, O. Castillo, A. Irabien and S. Perez-Yanez, Synthesis of heterometallic metal-organic frameworks and their performance as electrocatalyst for CO<sub>2</sub> reduction, *RSC Adv.*, 2018, **8**, 21092-21099.
